# Supplementary material for: Do Two Screening Tools for Chikungunya Virus Infection that were Developed among Younger Population Work Equally as Well in Patients Aged over 65 Years?
Source: PubMed Central journal article supplement (PMC5215818; doi:10.1371/journal.pntd.0005256), 2017-01-05

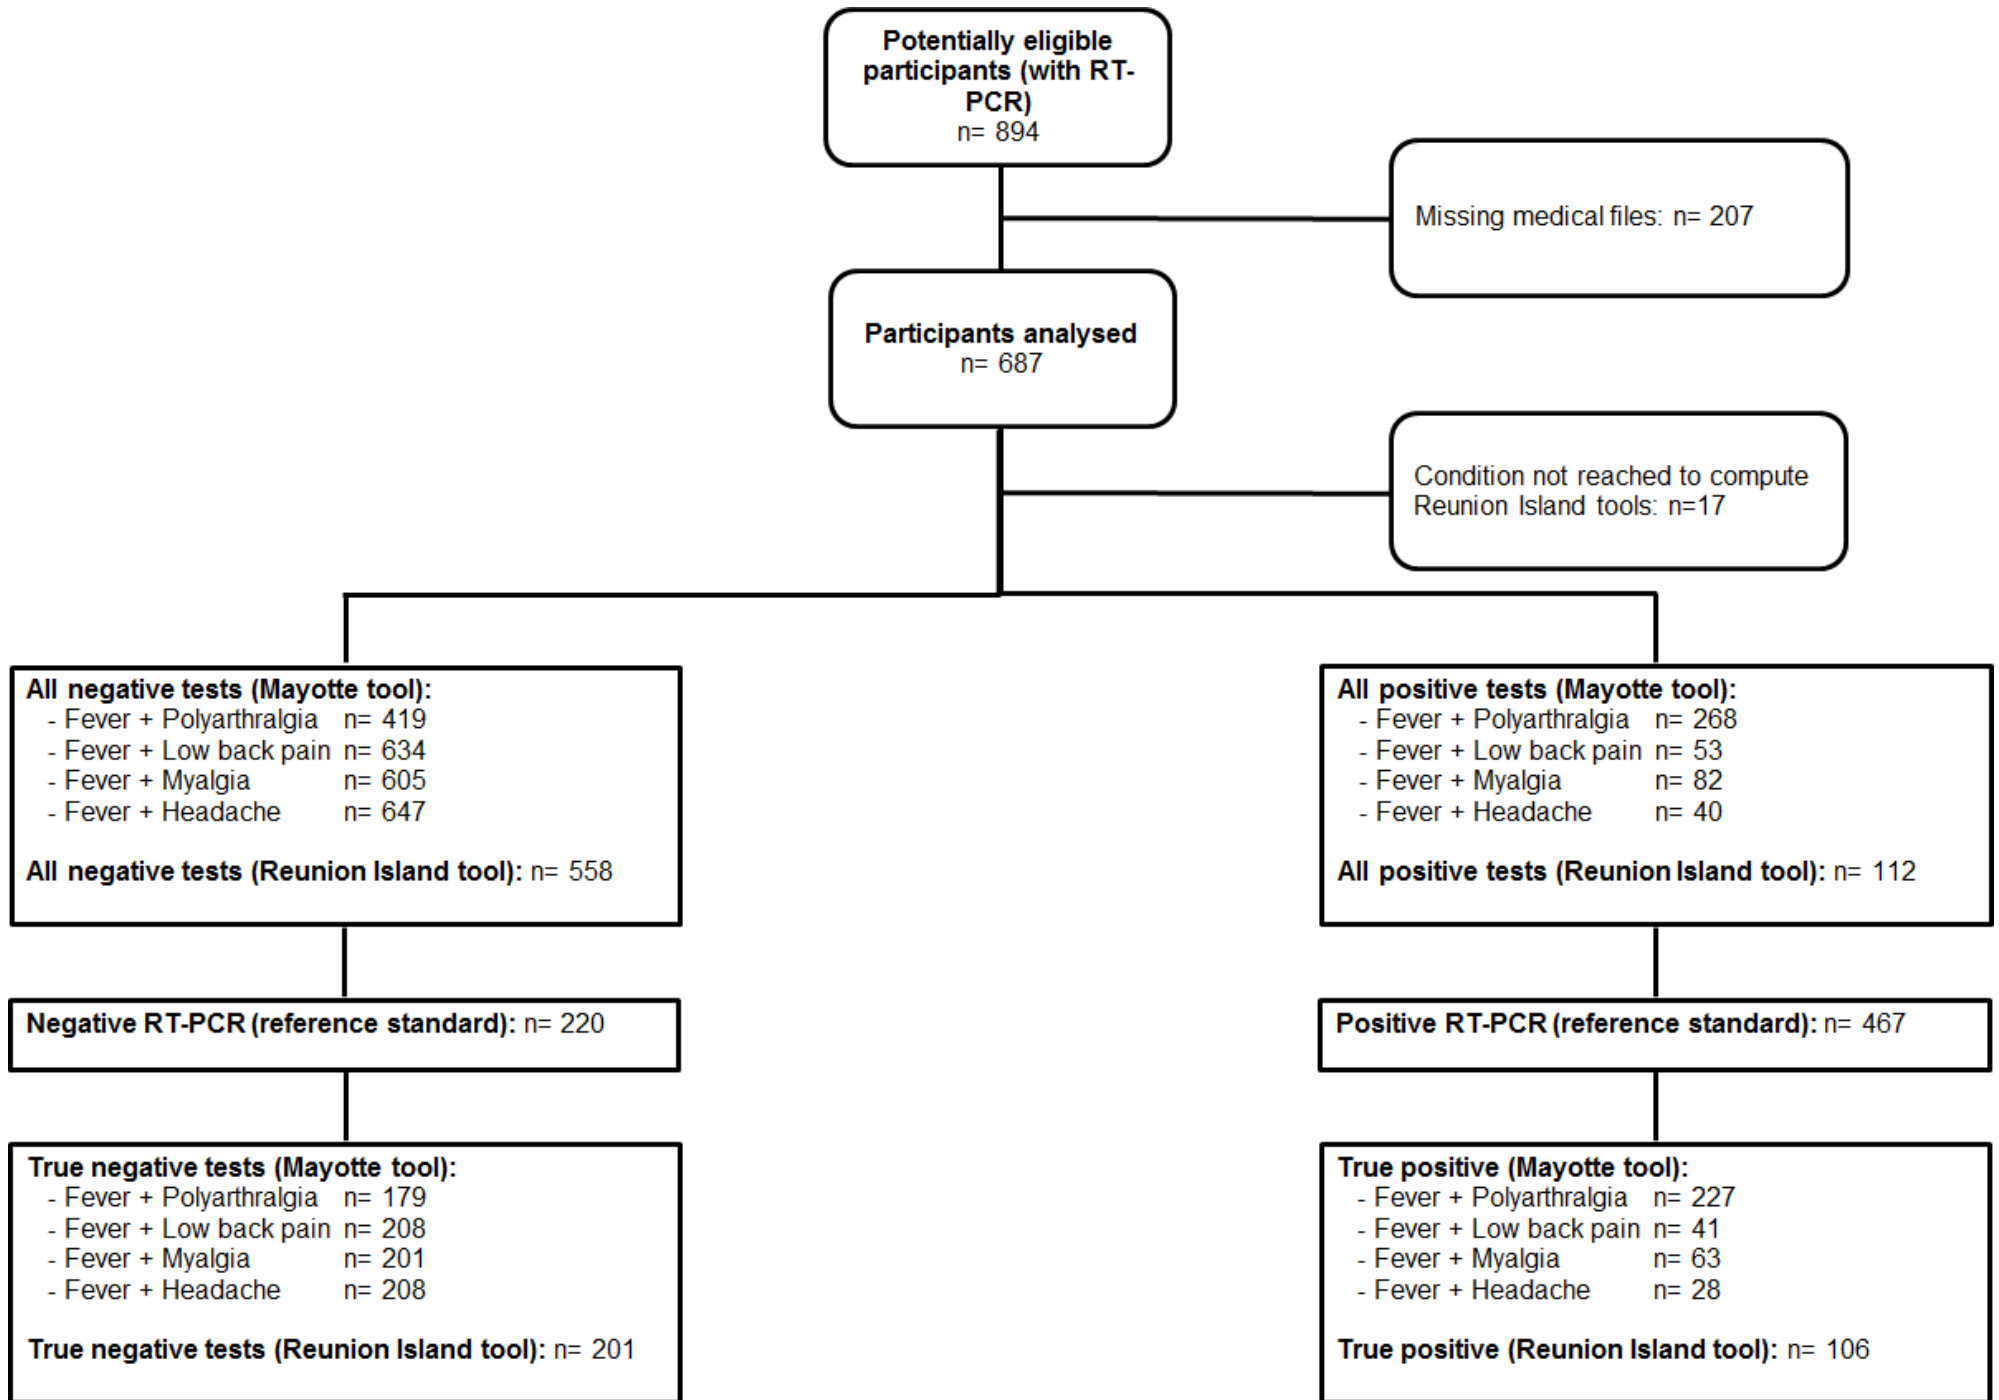

Supplement: pntd.0005256.s001.pdf [file pntd.0005256.s001.pdf]
